# Supplementary material for: Nonadiabatic molecular dynamics simulations for ultrafast photo-induced ring-opening and isomerization reactions of 2,2-diphenyl-2H-chromene
Source: Royal Society of Chemistry journal article supplement (doi:10.1039/d3cp04132h), 2023-01-01
Supplement: d3cp04132h1.pdf [file d3cp04132h1.pdf]

---

## Supplementary information for

### Nonadiabatic molecular dynamic simulations for ultrafast photo-induced ring-opening and isomerization reactions of 2,2-diphenyl-2H-chromene

He Wang,<sup>#a</sup> Tianhe Yang,<sup>#a</sup> Yuechun Li,<sup>a</sup> Le Yu,<sup>\*a</sup> Yibo Lei,<sup>\*a</sup> and Chaoyuan Zhu<sup>\*bc</sup>

<sup>a</sup>Key Laboratory of Synthetic and Natural Functional Molecule Chemistry of Ministry of Education, College of Chemistry & Materials Science, Shaanxi key Laboratory of Physico-Inorganic Chemistry, Northwest University, Xi'an, Shaanxi, 710127, P. R. China.

<sup>b</sup>Department of Applied Chemistry and Institute of Molecular Science, National Yang Ming Chiao-Tung University, Hsinchu 300, Taiwan.

<sup>c</sup>Key Laboratory of Theoretical Chemistry of Environment, Ministry of Education; School of Environment, South China Normal University, Guangzhou 51006, P. R. China.

<sup>#</sup>These authors contribute equally to this article.

\*Emails: yule@nwu.edu.cn(LY), leiyb@nwu.edu.cn(YL), cyzhu@mail.nctu.edu.tw(CZ)

Table S1--S<sub>1</sub> state configurations and S<sub>0</sub> and S<sub>1</sub> state relative energies calculated by (TD)-CAM-B3LYP-D3/def2-SVP and SDSPT2/def2-SVP on the basis of (TD)-CAM-B3LYP-D3 optimized geometries.

Table S2a--Optimized geometry structures of ten critical points for DPC in terms of internal coordinates at CAM-B3LYP-D3/def2-SVP level of theory.

Table S2b--Optimized geometry structures of ten critical points for DPC in terms of internal coordinates at CAM-B3LYP-D3/def2-SV(P) level of theory.

Table S3--Potential energies for optimized geometries in Table S1.

Table S4--Average lifetimes and standard deviations (in fs) of each dynamics steps for observed DPC reaction mechanisms.

Fig. S1--DPC-C↔DPC-T isomerization potential energy curves calculated by CAM-B3LYP-D3/def2-SVP.

Fig. S2--Hopping-spot distributions at CI-S<sub>1</sub>/S<sub>0</sub>-C and CI-S<sub>1</sub>/S<sub>0</sub>-T with respect to  $\phi_{H24C4C5C3}$  and  $\phi_{H23C3C4C2}$  dihedral angles.

---

Fig. S3--HOOP motions with respect to time evolution of  $r_{C5O6}$ ,  $\phi_{H24C4C5C12}$  and  $\phi_{H23C4C5C12}$  for two trajectories starting from FC-T.

Fig. S4--HOOP motions with respect to time evolution of  $r_{C5O6}$ ,  $\phi_{H24C4C5C12}$  and  $\phi_{H23C4C5C12}$  for two trajectories starting from FC-C.

Fig. S5--A typical ring-opening reactive trajectory starting from FC-T goes via FC-T $\rightarrow$ CI-S<sub>1</sub>/S<sub>0</sub>-T $\rightarrow$ S<sub>0</sub>-CC-C $\rightarrow$ S<sub>0</sub>-TC pathway as function of time.

Fig. S6--A typical ring-opening reactive trajectory starting from FC-C goes via FC-C $\rightarrow$ CI-S<sub>1</sub>/S<sub>0</sub>-C $\rightarrow$ S<sub>0</sub>-CC-T $\rightarrow$ S<sub>0</sub>-TC pathway as function of time.

Table S5--Cartesian coordinates (in Å) for geometries optimized in Table S1 at CAM-B3LYP-D3/def2-SVP level of theory.

Table S6--Cartesian coordinates (in Å) for geometries optimized in Table S1 at CAM-B3LYP-D3/def2-SV(P) level of theory.

**Table S1.** S<sub>1</sub> state configurations and S<sub>0</sub> and S<sub>1</sub> state relative energies calculated by (TD)-CAM-B3LYP-D3/def2-SVP and SDSPT2/def2-SVP on the basis of (TD)-CAM-B3LYP-D3 optimized geometries.

| State                                | S <sub>1</sub> configuration weight (%)  |                    | E <sub>TDDFT</sub> (eV) |                | E <sub>SDSPT2</sub> (eV) |                |
|--------------------------------------|------------------------------------------|--------------------|-------------------------|----------------|--------------------------|----------------|
|                                      | DFT                                      | SDSPT2             | S <sub>0</sub>          | S <sub>1</sub> | S <sub>0</sub>           | S <sub>1</sub> |
| S <sub>0</sub> -C                    | HOMO→LUMO (83.2)                         | HOMO-1→LUMO (36.8) | 0.07                    | 4.68           | 0.08                     | 4.80           |
|                                      |                                          | HOMO→LUMO+1 (22.7) |                         |                |                          |                |
| CI-S <sub>1</sub> /S <sub>0</sub> -C | HOMO→LUMO (94.2)                         | HOMO→LUMO (73.0)   | 3.04                    | 3.06           | 2.84                     | 3.33           |
| S <sub>0</sub> -CC-C                 | HOMO-2→LUMO (48.0)<br>HOMO→LUMO (34.6)   | HOMO-1→LUMO (61.1) | 1.25                    | 4.03           | 1.10                     | 3.82           |
|                                      |                                          |                    |                         |                |                          |                |
| S <sub>1</sub> -C                    | HOMO→LUMO (92.8)                         | HOMO-1→LUMO (34.1) | 0.50                    | 4.27           | 0.44                     | 4.64           |
|                                      |                                          | HOMO→LUMO+1 (16.7) |                         |                |                          |                |
| S <sub>0</sub> -TC                   | HOMO-2→LUMO (56.1)<br>HOMO-1→LUMO (33.9) | HOMO→LUMO (42.9)   | 0.93                    | 3.83           | 0.72                     | 4.01           |
|                                      |                                          | HOMO-1→LUMO (10.1) |                         |                |                          |                |
| S <sub>0</sub> -T                    | HOMO→LUMO (80.2)                         | HOMO-1→LUMO (38.3) | 0.00                    | 4.67           | 0.00                     | 4.77           |
|                                      |                                          | HOMO→LUMO+1 (24.4) |                         |                |                          |                |
| CI-S <sub>1</sub> /S <sub>0</sub> -T | HOMO→LUMO (96.7)                         | HOMO→LUMO (73.4)   | 2.56                    | 2.59           | 2.25                     | 2.69           |
| S <sub>0</sub> -CC-T                 | HOMO-2→LUMO (47.2)<br>HOMO→LUMO (35.3)   | HOMO-1→LUMO (61.8) | 1.24                    | 4.02           | 1.10                     | 3.82           |
|                                      |                                          |                    |                         |                |                          |                |
| S <sub>1</sub> -T                    | HOMO→LUMO (90.9)                         | HOMO-1→LUMO (34.8) | 0.35                    | 4.34           | 0.32                     | 4.57           |
|                                      |                                          | HOMO→LUMO+1 (16.8) |                         |                |                          |                |
| S <sub>0</sub> -TT                   | HOMO-2→LUMO (75.9)                       | HOMO→LUMO (38.1)   | 0.95                    | 3.96           | 0.72                     | 4.22           |
|                                      |                                          | HOMO-1→LUMO (11.3) |                         |                |                          |                |

**Table S2a.** Optimized geometry structures of ten critical points for DPC (bond length in angstrom and dihedral angles in degree)<sup>a</sup> by CAM-B3LYP-D3/def2-SVP in terms of internal coordinates.

|                                | S <sub>0</sub> -C | S <sub>1</sub> -C | CI-<br>S <sub>1</sub> /S <sub>0</sub> -C | S <sub>0</sub> -CC-<br>C | S <sub>0</sub> -T | S <sub>1</sub> -T | CI-<br>S <sub>1</sub> /S <sub>0</sub> -T | S <sub>0</sub> -CC-<br>T | S <sub>0</sub> -TC | S <sub>0</sub> -TT |
|--------------------------------|-------------------|-------------------|------------------------------------------|--------------------------|-------------------|-------------------|------------------------------------------|--------------------------|--------------------|--------------------|
| <i>r</i> <sub>O6C5</sub>       | 1.435             | 1.459             | 2.753                                    | 3.161                    | 1.434             | 1.444             | 2.564                                    | 2.935                    | 4.147              | 5.032              |
| <i>r</i> <sub>O6C1</sub>       | 1.354             | 1.319             | 1.232                                    | 1.218                    | 1.357             | 1.323             | 1.247                                    | 1.222                    | 1.225              | 1.221              |
| <i>r</i> <sub>C4C5</sub>       | 1.516             | 1.475             | 1.465                                    | 1.343                    | 1.516             | 1.478             | 1.468                                    | 1.356                    | 1.361              | 1.360              |
| <i>r</i> <sub>C3C4</sub>       | 1.334             | 1.389             | 1.360                                    | 1.466                    | 1.335             | 1.388             | 1.348                                    | 1.446                    | 1.434              | 1.436              |
| <i>r</i> <sub>C2C3</sub>       | 1.457             | 1.409             | 1.432                                    | 1.355                    | 1.459             | 1.408             | 1.474                                    | 1.368                    | 1.370              | 1.364              |
| <i>r</i> <sub>C1C2</sub>       | 1.402             | 1.459             | 1.473                                    | 1.502                    | 1.403             | 1.457             | 1.454                                    | 1.495                    | 1.495              | 1.499              |
| <i>r</i> <sub>H29O6</sub>      | 3.349             | 2.636             | 3.792                                    | 4.505                    | 2.660             | 2.903             | 3.214                                    | 2.960                    | 6.564              | 6.418              |
| <i>r</i> <sub>H29C11</sub>     | 2.533             | 2.900             | 2.557                                    | 2.619                    | 2.898             | 2.678             | 2.729                                    | 2.829                    | 2.900              | 2.825              |
| <i>r</i> <sub>H33C4</sub>      | 2.554             | 2.547             | 2.575                                    | 2.699                    | 2.497             | 2.543             | 2.642                                    | 2.876                    | 2.966              | 2.919              |
| <i>r</i> <sub>H38O6</sub>      | 2.336             | 2.607             | 2.408                                    | 2.398                    | 2.312             | 2.369             | 2.763                                    | 4.108                    | 3.776              | 6.567              |
| <i>r</i> <sub>H34C12</sub>     | 3.025             | 2.540             | 3.026                                    | 3.517                    | 2.666             | 2.740             | 2.758                                    | 2.679                    | 2.613              | 2.671              |
| <i>θ</i> <sub>C5C4C3</sub>     | 121.7             | 120.7             | 134.1                                    | 126.3                    | 120.4             | 122.1             | 127.4                                    | 129.7                    | 124.3              | 125.2              |
| <i>θ</i> <sub>C4C3C2</sub>     | 120.5             | 120.0             | 134.6                                    | 130.5                    | 120.0             | 120.8             | 125.2                                    | 132.8                    | 127.6              | 126.9              |
| <i>θ</i> <sub>C3C2C1</sub>     | 117.2             | 118.1             | 124.2                                    | 122.6                    | 117.0             | 117.7             | 117.1                                    | 124.1                    | 123.2              | 116.5              |
| <i>θ</i> <sub>C5O6C1</sub>     | 121.6             | 121.9             | 113.0                                    | 102.0                    | 118.5             | 124.5             | 97.9                                     | 106.2                    | 94.9               | 77.2               |
| <i>φ</i> <sub>C13C12C5C4</sub> | -148.3            | 178.9             | 177.1                                    | 156.2                    | 174.5             | -166.3            | 154.6                                    | 142.0                    | 126.7              | 131.8              |
| <i>φ</i> <sub>C18C11C5C4</sub> | 57.6              | 98.5              | 99.6                                     | 81.8                     | 80.1              | 78.6              | 143.0                                    | 133.9                    | 151.0              | 144.2              |
| <i>φ</i> <sub>O6C5C4C3</sub>   | -20.9             | -24.9             | -14.6                                    | -69.8                    | 28.4              | 3.7               | 41.9                                     | 49.4                     | -166.0             | 2.0                |
| <i>φ</i> <sub>C5C4C3C2</sub>   | 3.3               | 12.1              | 5.4                                      | 70.8                     | -1.5              | 0.4               | -3.8                                     | -43.8                    | 176.0              | 173.0              |
| <i>φ</i> <sub>C4C3C2C1</sub>   | 8.3               | 0.7               | 9.9                                      | 5.2                      | -13.5             | -1.9              | -36.8                                    | -7.0                     | -1.7               | 177.7              |
| <i>φ</i> <sub>C2C1O6C5</sub>   | -19.9             | -16.3             | -13.1                                    | -25.6                    | 31.1              | 5.9               | 52.1                                     | 21.0                     | -0.4               | 0.9                |
| <i>φ</i> <sub>C4C12C11C5</sub> | -34.1             | -32.6             | -9.2                                     | -1.0                     | -32.8             | -31.9             | -3.2                                     | -1.6                     | -0.3               | -0.4               |

<sup>a</sup>The CIs are optimized by BDF program with inclusion of RI.

**Table S2b.** Optimized geometry structures of ten critical points for DPC (bond length in angstrom and dihedral angles in degree)<sup>a</sup> by CAM-B3LYP-D3/def2-SV(P) in terms of internal coordinates.

|                                | S <sub>0</sub> -C | S <sub>1</sub> -C | CI-<br>S <sub>1</sub> /S <sub>0</sub> -C | S <sub>0</sub> -CC-<br>C | S <sub>0</sub> -T | S <sub>1</sub> -T | CI-<br>S <sub>1</sub> /S <sub>0</sub> -T | S <sub>0</sub> -CC-<br>T | S <sub>0</sub> -TC | S <sub>0</sub> -TT |
|--------------------------------|-------------------|-------------------|------------------------------------------|--------------------------|-------------------|-------------------|------------------------------------------|--------------------------|--------------------|--------------------|
| <i>r</i> <sub>O6C5</sub>       | 1.435             | 1.459             | 2.870                                    | 3.073                    | 1.434             | 1.444             | 2.567                                    | 2.935                    | 4.150              | 5.032              |
| <i>r</i> <sub>O6C1</sub>       | 1.354             | 1.319             | 1.221                                    | 1.219                    | 1.356             | 1.323             | 1.246                                    | 1.222                    | 1.224              | 1.221              |
| <i>r</i> <sub>C4C5</sub>       | 1.516             | 1.476             | 1.485                                    | 1.348                    | 1.516             | 1.478             | 1.471                                    | 1.357                    | 1.362              | 1.361              |
| <i>r</i> <sub>C3C4</sub>       | 1.334             | 1.390             | 1.351                                    | 1.458                    | 1.336             | 1.388             | 1.345                                    | 1.447                    | 1.435              | 1.437              |
| <i>r</i> <sub>C2C3</sub>       | 1.458             | 1.409             | 1.465                                    | 1.360                    | 1.459             | 1.409             | 1.477                                    | 1.368                    | 1.370              | 1.365              |
| <i>r</i> <sub>C1C2</sub>       | 1.402             | 1.459             | 1.467                                    | 1.499                    | 1.403             | 1.457             | 1.454                                    | 1.495                    | 1.495              | 1.499              |
| <i>r</i> <sub>H29O6</sub>      | 3.319             | 2.643             | 3.839                                    | 4.900                    | 2.664             | 2.903             | 3.215                                    | 2.951                    | 6.578              | 6.420              |
| <i>r</i> <sub>H29C11</sub>     | 2.544             | 2.893             | 2.564                                    | 2.496                    | 2.897             | 2.679             | 2.729                                    | 2.830                    | 2.893              | 2.823              |
| <i>r</i> <sub>H33C4</sub>      | 2.544             | 2.552             | 2.570                                    | 2.663                    | 2.497             | 2.543             | 2.642                                    | 2.877                    | 2.961              | 2.917              |
| <i>r</i> <sub>H38O6</sub>      | 2.345             | 2.606             | 2.345                                    | 2.580                    | 2.312             | 2.369             | 2.764                                    | 4.097                    | 2.804              | 6.568              |
| <i>r</i> <sub>H34C12</sub>     | 2.988             | 2.542             | 3.060                                    | 3.717                    | 2.669             | 2.741             | 2.758                                    | 2.682                    | 2.617              | 2.673              |
| <i>θ</i> <sub>C5C4C3</sub>     | 121.8             | 120.7             | 127.7                                    | 127.3                    | 120.4             | 122.1             | 127.5                                    | 129.6                    | 124.3              | 125.2              |
| <i>θ</i> <sub>C4C3C2</sub>     | 120.5             | 120.2             | 138.5                                    | 131.8                    | 120.0             | 120.8             | 125.2                                    | 132.7                    | 127.6              | 127.0              |
| <i>θ</i> <sub>C3C2C1</sub>     | 117.2             | 118.1             | 123.9                                    | 123.3                    | 117.0             | 117.7             | 117.0                                    | 124.0                    | 123.2              | 116.5              |
| <i>θ</i> <sub>C5C6O1</sub>     | 121.7             | 122.0             | 108.1                                    | 103.3                    | 118.5             | 124.5             | 97.8                                     | 106.3                    | 94.9               | 77.3               |
| <i>φ</i> <sub>C13C12C5C4</sub> | -149.9            | 179.3             | 179.9                                    | 152.1                    | 174.7             | -166.2            | 154.5                                    | 133.9                    | 127.3              | 132.1              |
| <i>φ</i> <sub>C18C11C5C4</sub> | 59.6              | 98.4              | 97.0                                     | 66.2                     | 79.9              | 78.6              | 143.1                                    | 141.9                    | 150.5              | 144.1              |
| <i>φ</i> <sub>O6C5C4C3</sub>   | -20.5             | -24.8             | -13.9                                    | -62.0                    | 28.4              | 3.8               | 41.9                                     | 49.5                     | -165.2             | 2.1                |
| <i>φ</i> <sub>C5C4C3C2</sub>   | 3.2               | 12.2              | 5.5                                      | 59.7                     | -1.6              | 0.4               | -3.8                                     | -44.0                    | 175.8              | 172.9              |
| <i>φ</i> <sub>C4C3C2C1</sub>   | 8.0               | 0.6               | 20.7                                     | 6.2                      | -13.4             | -1.9              | -36.9                                    | -6.9                     | -1.8               | 177.7              |
| <i>φ</i> <sub>C2C1O6C5</sub>   | -19.7             | -16.1             | -12.8                                    | -24.6                    | 31.1              | 6.0               | 52.1                                     | 20.8                     | -0.4               | 0.9                |
| <i>φ</i> <sub>C4C12C11C5</sub> | -34.2             | -32.6             | -11.4                                    | -1.3                     | -32.8             | -31.9             | -3.1                                     | -1.6                     | -0.3               | -0.4               |

<sup>a</sup>The CIs are optimized by BDF program without inclusion of RI.

**Table S3.** Potential energies in eV for optimized geometries in Table S1.

| Basis set  | Geometries                           | S <sub>0</sub> | S <sub>1</sub> | S <sub>2</sub> | S <sub>3</sub> |
|------------|--------------------------------------|----------------|----------------|----------------|----------------|
| def2-SVP   | S <sub>0</sub> -C                    | 0.07           | 4.68           | 5.28           | 5.57           |
|            | S <sub>1</sub> -C                    | 0.50           | 4.27           | 5.25           | 5.76           |
|            | CI-S <sub>1</sub> /S <sub>0</sub> -C | 3.04           | 3.06           | 5.00           | 5.22           |
|            | S <sub>0</sub> -CC                   | 1.24           | 4.03           | 4.56           | 5.07           |
|            | S <sub>0</sub> -TC                   | 0.93           | 3.83           | 4.15           | 4.97           |
|            | S <sub>0</sub> -T                    | 0.00           | 4.67           | 5.28           | 5.51           |
|            | S <sub>1</sub> -T                    | 0.35           | 4.34           | 5.23           | 5.75           |
|            | CI-S <sub>1</sub> /S <sub>0</sub> -T | 2.56           | 2.59           | 4.17           | 5.11           |
|            | S <sub>0</sub> -CC-T                 | 1.24           | 4.02           | 4.55           | 5.06           |
|            | S <sub>0</sub> -TT                   | 0.95           | 3.96           | 4.22           | 5.10           |
| def2-SV(P) | S <sub>0</sub> -C                    | 0.07           | 4.68           | 5.28           | 5.58           |
|            | S <sub>1</sub> -C                    | 0.50           | 4.27           | 5.26           | 5.76           |
|            | CI-S <sub>1</sub> /S <sub>0</sub> -C | 3.05           | 3.06           | 5.00           | 5.23           |
|            | S <sub>0</sub> -CC                   | 1.24           | 4.02           | 4.55           | 5.07           |
|            | S <sub>0</sub> -TC                   | 0.93           | 3.83           | 4.15           | 4.98           |
|            | S <sub>0</sub> -T                    | 0.00           | 4.67           | 5.28           | 5.52           |
|            | S <sub>1</sub> -T                    | 0.35           | 4.35           | 5.23           | 5.75           |
|            | CI-S <sub>1</sub> /S <sub>0</sub> -T | 2.56           | 2.59           | 4.17           | 5.11           |
|            | S <sub>0</sub> -CC-T                 | 1.24           | 4.02           | 4.55           | 5.06           |
|            | S <sub>0</sub> -TT                   | 0.95           | 3.96           | 4.22           | 5.09           |

**Table S4.** Average lifetimes and standard deviations (in fs) of each dynamics steps for observed DPC reaction mechanisms.

| Mechanism                                                                         | No. | S <sub>1</sub> /S <sub>0</sub> hop | S <sub>0</sub> -CC-T/C | S <sub>0</sub> product |
|-----------------------------------------------------------------------------------|-----|------------------------------------|------------------------|------------------------|
| FC-T→CI-S <sub>1</sub> /S <sub>0</sub> -T→S <sub>0</sub> -CC-T→S <sub>0</sub> -TC | 162 | 124.3 (100.2)                      | 161.8 (107.3)          | 1305.7(623.3)          |
| FC-T→CI-S <sub>1</sub> /S <sub>0</sub> -T→S <sub>0</sub> -CC-C→S <sub>0</sub> -TC | 13  | 118.7 (24.3)                       | 195.2 (41.6)           | 867.5 (292.5)          |
| FC-T→CI-S <sub>1</sub> /S <sub>0</sub> -C→S <sub>0</sub> -CC-C→S <sub>0</sub> -TC | 6   | 615.5 (136.0)                      | 636.5 (134.3)          | 979.8 (112.4)          |
| FC-T→CI-S <sub>1</sub> /S <sub>0</sub> -T→S <sub>0</sub> -T                       | 19  | 150.5 (45.3)                       |                        | 209.5 (51.0)           |
| FC-C→CI-S <sub>1</sub> /S <sub>0</sub> -C→S <sub>0</sub> -CC-C→S <sub>0</sub> -TC | 69  | 439.8 (214.0)                      | 517.3 (221.9)          | 1125.7 (370.3)         |
| FC-C→CI-S <sub>1</sub> /S <sub>0</sub> -C→S <sub>0</sub> -CC-T→S <sub>0</sub> -TC | 18  | 380.2 (195.0)                      | 580.8 (198.8)          | 1248.7 (554.0)         |
| FC-C→CI-S <sub>1</sub> /S <sub>0</sub> -T→S <sub>0</sub> -CC-T→S <sub>0</sub> -TC | 27  | 457.9 (225.3)                      | 572.6 (250.5)          | 1380.4 (338.9)         |
| FC-C→CI-S <sub>1</sub> /S <sub>0</sub> -C→S <sub>0</sub> -C                       | 35  | 566.9 (259.8)                      |                        | 673.3 (277.1)          |
| FC-C→CI-S <sub>1</sub> /S <sub>0</sub> -T→S <sub>0</sub> -T                       | 1   | 317.0                              |                        | 397.5                  |

**Fig. S1** DPC-C $\leftrightarrow$ DPC-T isomerization potential energy curves calculated by CAM-B3LYP-D3/def2-SVP on (a)  $S_0$  state (MEP) and (b)  $S_1$  state (LIIC).

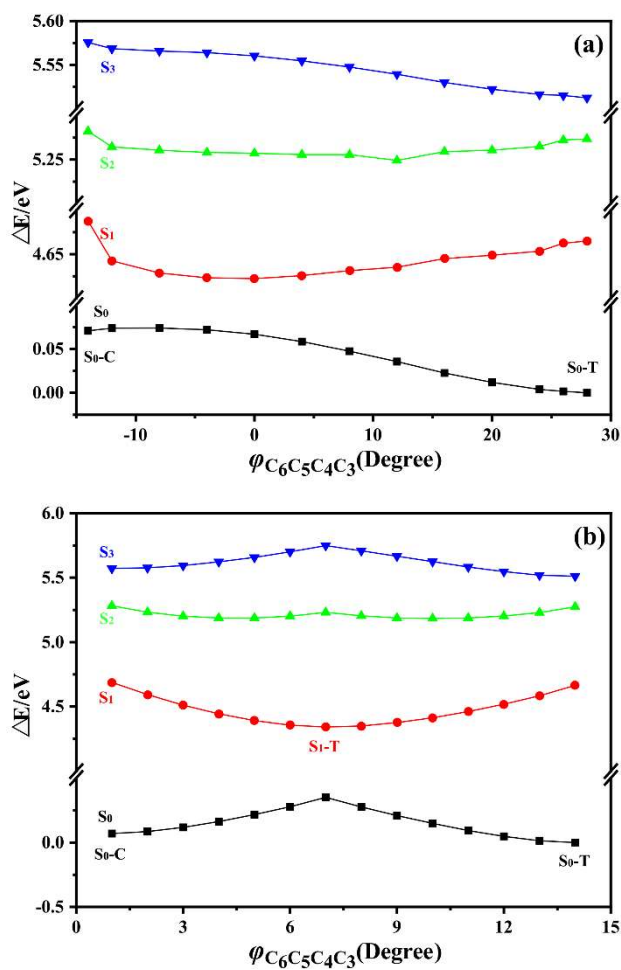



**Fig. S2** Hopping-spot distributions at CI-S<sub>1</sub>/S<sub>0</sub>-C and CI-S<sub>1</sub>/S<sub>0</sub>-T with respect to  $\phi_{\text{H24C4C5C3}}$  and  $\phi_{\text{H23C3C4C2}}$  dihedral angles for trajectories starting from (a) FC-T and (b) FC-C.

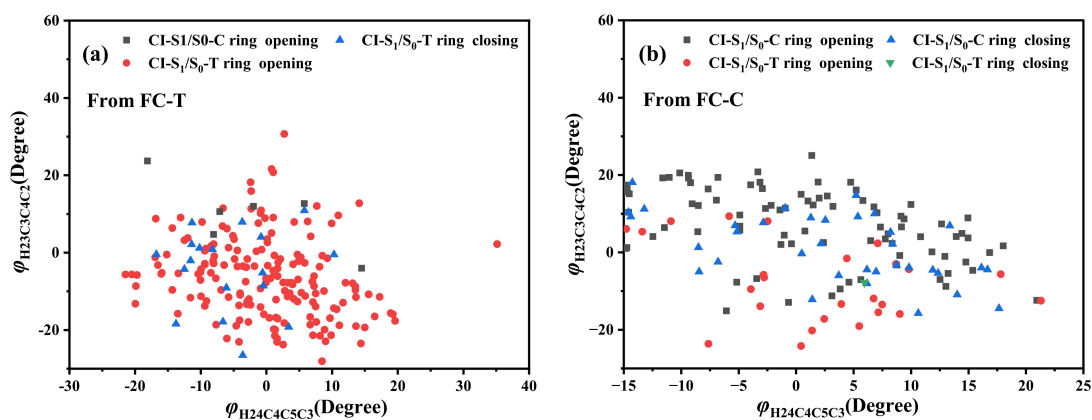

**Fig. S3** HOOP motions with respect to time evolution of  $r_{\text{C5O6}}$ ,  $\phi_{\text{H24C4C5C12}}$  and  $\phi_{\text{H23C4C5C12}}$  for two trajectories starting from FC-T. (a) one trajectory and (b) another.

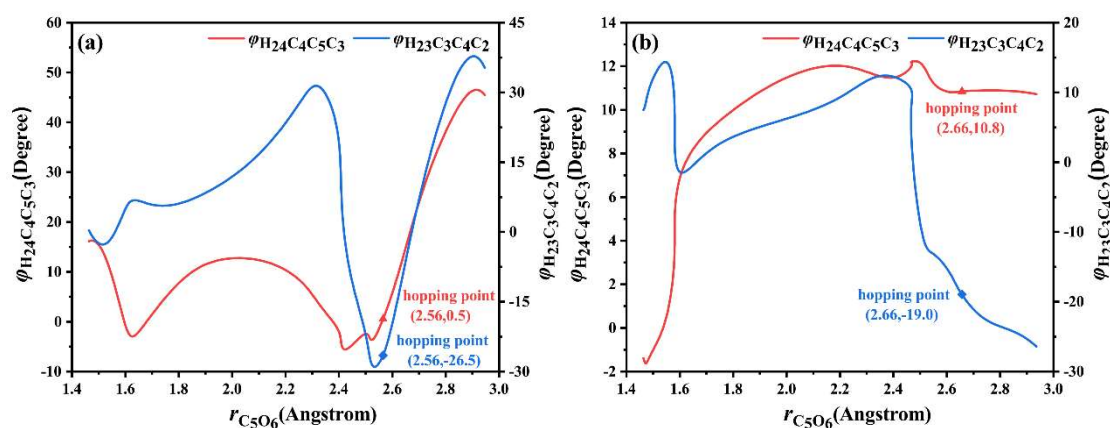

**Fig. S4** The same as in Fig. S3 except for trajectories starting from FC-C.

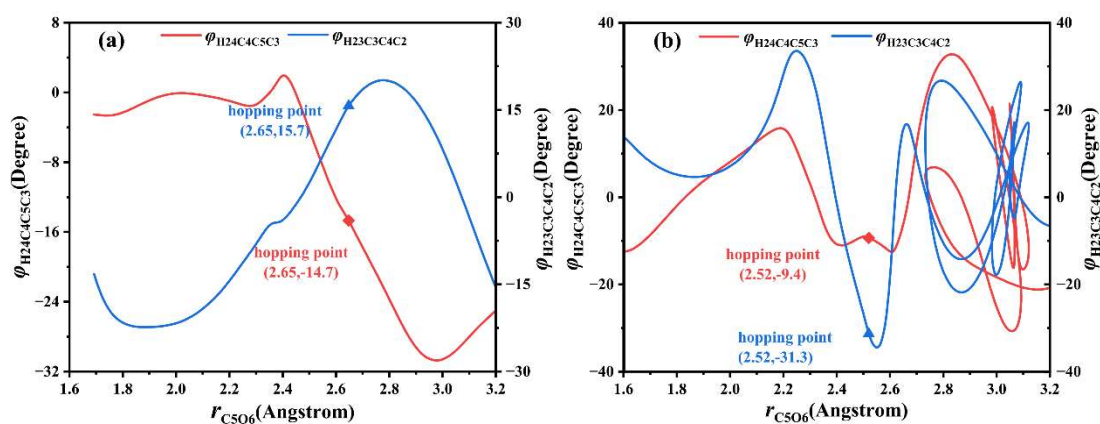

**Fig. S5** A typical ring-opening reactive trajectory starting from FC-T goes via FC-T $\rightarrow$ CI-S<sub>1</sub>/S<sub>0</sub>-T $\rightarrow$ S<sub>0</sub>-CC-C $\rightarrow$ S<sub>0</sub>-TC pathway as function of time. (a) Potential energy profiles of the S<sub>0</sub> and S<sub>1</sub> states, (b) evolution of  $r_{C5O6}$ ,  $r_{H38O6}$  and  $r_{H29O6}$ , (c)  $\phi_{O6C5C4C3}$ ,  $\phi_{C5C4C3C2}$  and  $\phi_{C4C3C2C1}$ , and (d)  $\phi_{C18C11C5C4}$ ,  $\phi_{C17C12C5C4}$  and  $\phi_{H24C4C5C12}$ .

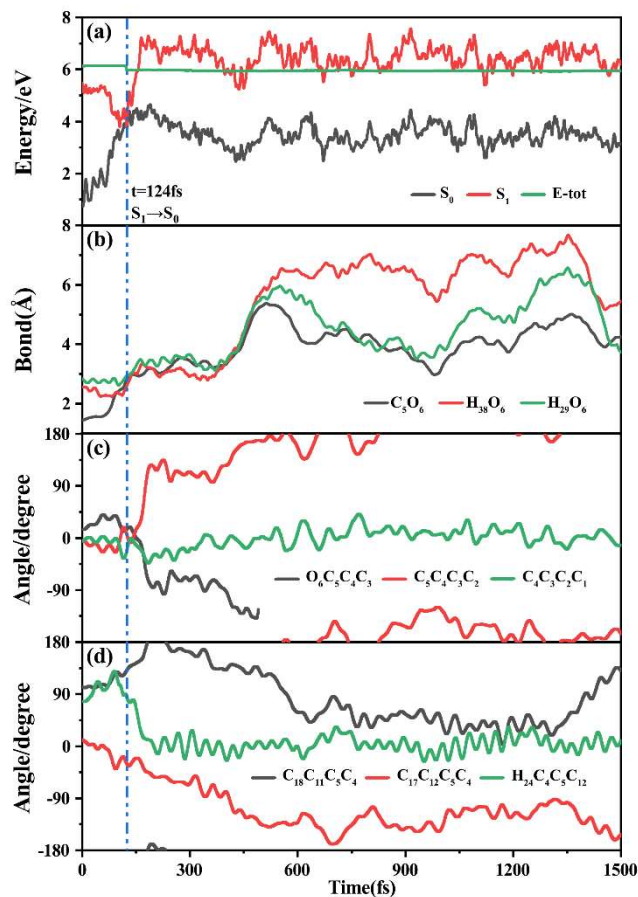

**Fig. S6** A typical ring-opening reactive trajectory starting from FC-C goes via FC-C $\rightarrow$ CI-S<sub>1</sub>/S<sub>0</sub>-C $\rightarrow$ S<sub>0</sub>-CC-T $\rightarrow$ S<sub>0</sub>-TC pathway as function of time. (a) Potential energy profiles of the S<sub>0</sub> and S<sub>1</sub> states, (b) evolution of  $r_{C5O6}$ ,  $r_{H38O6}$  and  $r_{H29O6}$ , (c)  $\phi_{O6C5C4C3}$ ,  $\phi_{C5C4C3C2}$  and  $\phi_{C4C3C2C1}$ , and (d)  $\phi_{C18C11C5C4}$ ,  $\phi_{C17C12C5C4}$  and  $\phi_{H24C4C5C12}$ .

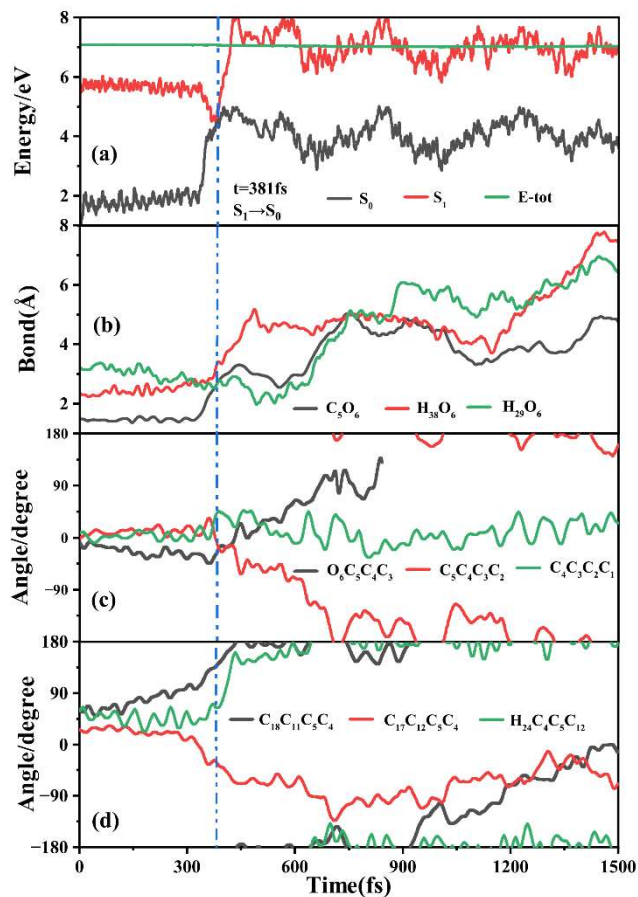

**Table S5.** Cartesian coordinates (in Å) for geometries optimized in Table S1 at CAM-B3LYP-D3/def2-SVP level of theory.

| S <sub>0</sub> -C |           |           |           | S <sub>0</sub> -T |           |           |           |
|-------------------|-----------|-----------|-----------|-------------------|-----------|-----------|-----------|
| C                 | 1.505715  | 1.994850  | 0.978185  | C                 | 0.006144  | 2.180664  | 1.112111  |
| C                 | 1.750575  | 3.354294  | 0.829815  | C                 | 0.048473  | 3.551322  | 0.853578  |
| C                 | 1.113063  | 4.074865  | -0.179909 | C                 | -0.233596 | 4.031014  | -0.419469 |
| C                 | 0.235890  | 3.420930  | -1.037427 | C                 | -0.561332 | 3.134925  | -1.437762 |
| C                 | -0.007297 | 2.055283  | -0.890098 | C                 | -0.610385 | 1.772693  | -1.176557 |
| C                 | 0.622672  | 1.331354  | 0.119969  | C                 | -0.328475 | 1.282876  | 0.102805  |
| C                 | 0.359917  | -0.165536 | 0.305587  | C                 | -0.390017 | -0.232913 | 0.320174  |
| C                 | -0.157341 | -0.386767 | 1.713292  | C                 | 0.063027  | -0.646676 | 1.706006  |
| C                 | -1.458307 | -0.533690 | 1.967217  | C                 | 1.339472  | -0.964040 | 1.933286  |
| C                 | -2.426721 | -0.556693 | 0.878332  | C                 | 2.301301  | -0.946030 | 0.836317  |
| C                 | -1.920758 | -0.598300 | -0.428905 | C                 | 1.782375  | -0.876171 | -0.465672 |
| O                 | -0.588926 | -0.609741 | -0.674564 | O                 | 0.442724  | -0.848108 | -0.672280 |
| C                 | 1.609227  | -1.004247 | 0.031552  | C                 | -1.802409 | -0.760307 | 0.078333  |
| C                 | 2.609562  | -0.556239 | -0.832099 | C                 | -2.900873 | -0.078435 | 0.606481  |
| C                 | 3.704200  | -1.365055 | -1.125984 | C                 | -4.187750 | -0.581286 | 0.445806  |
| C                 | 3.811083  | -2.632626 | -0.560326 | C                 | -4.392298 | -1.769987 | -0.250977 |
| C                 | 2.812317  | -3.090300 | 0.295728  | C                 | -3.300790 | -2.451010 | -0.780802 |
| C                 | 1.718008  | -2.281008 | 0.585317  | C                 | -2.010939 | -1.951995 | -0.613932 |
| C                 | -2.782042 | -0.679528 | -1.520092 | C                 | 2.625133  | -0.906263 | -1.571705 |
| C                 | -4.157218 | -0.699929 | -1.310486 | C                 | 4.000684  | -0.992995 | -1.381952 |
| C                 | -4.678224 | -0.645701 | -0.017739 | C                 | 4.535768  | -1.054629 | -0.095383 |
| C                 | -3.810333 | -0.580936 | 1.066637  | C                 | 3.684845  | -1.036748 | 1.003816  |
| H                 | 2.022649  | 1.440529  | 1.764124  | H                 | 0.245715  | 1.810720  | 2.109504  |
| H                 | 2.446134  | 3.856511  | 1.505369  | H                 | 0.311470  | 4.244590  | 1.655356  |
| H                 | 1.305630  | 5.143144  | -0.297706 | H                 | -0.196191 | 5.103267  | -0.623551 |
| H                 | -0.265689 | 3.973962  | -1.834215 | H                 | -0.782055 | 3.504459  | -2.441376 |
| H                 | -0.685999 | 1.545074  | -1.571459 | H                 | -0.867456 | 1.067673  | -1.969082 |
| H                 | 0.579176  | -0.368343 | 2.516992  | H                 | -0.686853 | -0.659556 | 2.498449  |
| H                 | -1.821210 | -0.644046 | 2.991634  | H                 | 1.682742  | -1.251245 | 2.930040  |
| H                 | 2.534577  | 0.435101  | -1.279623 | H                 | -2.749387 | 0.862922  | 1.138466  |
| H                 | 4.479980  | -1.000699 | -1.802608 | H                 | -5.037634 | -0.036039 | 0.861417  |
| H                 | 4.671598  | -3.265106 | -0.788079 | H                 | -5.402621 | -2.162814 | -0.382545 |
| H                 | 2.883461  | -4.085268 | 0.739523  | H                 | -3.451475 | -3.383592 | -1.328736 |
| H                 | 0.930418  | -2.649538 | 1.245231  | H                 | -1.153313 | -2.482265 | -1.025754 |
| H                 | -2.351759 | -0.728622 | -2.521361 | H                 | 2.183712  | -0.857969 | -2.567913 |
| H                 | -4.829699 | -0.757857 | -2.168731 | H                 | 4.662745  | -1.009237 | -2.250186 |
| H                 | -5.757462 | -0.660273 | 0.142724  | H                 | 5.615580  | -1.121848 | 0.048703  |
| H                 | -4.202688 | -0.551226 | 2.085989  | H                 | 4.091352  | -1.097901 | 2.016353  |

| S <sub>0</sub> -CC-C |           |           |           | S <sub>0</sub> -CC-T |           |           |           |
|----------------------|-----------|-----------|-----------|----------------------|-----------|-----------|-----------|
| C                    | 0.351150  | 1.742348  | -0.988102 | C                    | -0.005272 | 0.013049  | 0.008079  |
| C                    | 0.969523  | 2.929762  | -0.612520 | C                    | -0.014522 | 0.014066  | 1.398242  |
| C                    | 0.840107  | 3.400937  | 0.691576  | C                    | 1.184417  | 0.013425  | 2.107094  |
| C                    | 0.077338  | 2.686093  | 1.612574  | C                    | 2.393367  | 0.009815  | 1.415543  |
| C                    | -0.544265 | 1.503130  | 1.235384  | C                    | 2.402963  | 0.014500  | 0.025348  |
| C                    | -0.402046 | 1.007354  | -0.067118 | C                    | 1.204162  | 0.024800  | -0.700509 |
| C                    | -1.034029 | -0.273322 | -0.450069 | C                    | 1.215193  | 0.049353  | -2.182548 |
| C                    | -0.380205 | -1.238662 | -1.143206 | C                    | 2.149070  | 0.785465  | -2.835324 |
| C                    | 1.012344  | -1.321708 | -1.524278 | C                    | 2.407004  | 0.904023  | -4.253282 |
| C                    | 2.176307  | -1.067283 | -0.852940 | C                    | 2.475576  | -0.013420 | -5.265182 |
| C                    | 2.248251  | -0.744725 | 0.605210  | C                    | 2.423464  | -1.493131 | -5.058609 |
| O                    | 1.264241  | -0.692592 | 1.327145  | O                    | 2.321287  | -2.010575 | -3.956722 |
| C                    | -2.463614 | -0.458040 | -0.104408 | C                    | 0.146335  | -0.693887 | -2.883694 |
| C                    | -3.357248 | 0.621060  | -0.147379 | C                    | -0.141838 | -2.018544 | -2.530146 |
| C                    | -4.702204 | 0.442575  | 0.155580  | C                    | -1.118010 | -2.734779 | -3.210297 |
| C                    | -5.177319 | -0.814787 | 0.521216  | C                    | -1.831480 | -2.135924 | -4.246431 |
| C                    | -4.297273 | -1.892632 | 0.582078  | C                    | -1.569975 | -0.812202 | -4.590974 |
| C                    | -2.953379 | -1.715774 | 0.272715  | C                    | -0.589424 | -0.096979 | -3.912253 |
| C                    | 3.592741  | -0.519018 | 1.150654  | C                    | 2.534500  | -2.317877 | -6.268349 |
| C                    | 4.702643  | -0.626164 | 0.391124  | C                    | 2.702627  | -1.777082 | -7.492976 |
| C                    | 4.626206  | -0.986718 | -1.007370 | C                    | 2.798611  | -0.345910 | -7.677071 |
| C                    | 3.425212  | -1.204688 | -1.583672 | C                    | 2.701200  | 0.479514  | -6.613577 |
| H                    | 0.445165  | 1.379403  | -2.012557 | H                    | -0.947518 | 0.014343  | -0.542221 |
| H                    | 1.550102  | 3.494592  | -1.344823 | H                    | -0.966555 | 0.015345  | 1.933114  |
| H                    | 1.326167  | 4.332606  | 0.988473  | H                    | 1.176562  | 0.007134  | 3.199246  |
| H                    | -0.028748 | 3.050892  | 2.636175  | H                    | 3.337684  | -0.009053 | 1.963597  |
| H                    | -1.122545 | 0.931965  | 1.962184  | H                    | 3.351560  | -0.020862 | -0.513133 |
| H                    | -0.996702 | -2.040504 | -1.562687 | H                    | 2.749303  | 1.466411  | -2.223181 |
| H                    | 1.154923  | -1.721322 | -2.536944 | H                    | 2.649972  | 1.930293  | -4.559495 |
| H                    | -2.990033 | 1.607910  | -0.432881 | H                    | 0.432277  | -2.494157 | -1.734543 |
| H                    | -5.385206 | 1.293233  | 0.106515  | H                    | -1.319689 | -3.771721 | -2.934583 |
| H                    | -6.231989 | -0.952951 | 0.768337  | H                    | -2.599553 | -2.699533 | -4.780361 |
| H                    | -4.658076 | -2.877398 | 0.886087  | H                    | -2.137786 | -0.330855 | -5.389851 |
| H                    | -2.260872 | -2.555378 | 0.352929  | H                    | -0.392253 | 0.942933  | -4.176050 |
| H                    | 3.630977  | -0.256158 | 2.208988  | H                    | 2.468881  | -3.395477 | -6.108267 |
| H                    | 5.685921  | -0.445605 | 0.833137  | H                    | 2.776760  | -2.424812 | -8.370390 |
| H                    | 5.546536  | -1.082699 | -1.585776 | H                    | 2.953531  | 0.055148  | -8.680006 |
| H                    | 3.362651  | -1.479528 | -2.639722 | H                    | 2.774392  | 1.561943  | -6.748182 |

| <b>S<sub>1</sub>-C</b> |           |           |           | <b>S<sub>1</sub>-T</b> |           |           |           |
|------------------------|-----------|-----------|-----------|------------------------|-----------|-----------|-----------|
| C                      | 1.586063  | 2.068759  | 0.305516  | C                      | 0.006787  | -0.187910 | -0.053684 |
| C                      | 1.587233  | 3.447093  | 0.149092  | C                      | 0.028541  | -0.217318 | 1.334738  |
| C                      | 0.413646  | 4.127161  | -0.184129 | C                      | 1.220529  | -0.005103 | 2.026144  |
| C                      | -0.762070 | 3.401593  | -0.356840 | C                      | 2.391608  | 0.234722  | 1.311375  |
| C                      | -0.777621 | 2.020808  | -0.194711 | C                      | 2.376124  | 0.272480  | -0.079194 |
| C                      | 0.402762  | 1.331085  | 0.129520  | C                      | 1.180376  | 0.069346  | -0.773246 |
| C                      | 0.405596  | -0.189362 | 0.373751  | C                      | 1.114764  | 0.147512  | -2.300641 |
| C                      | -0.136578 | -0.345343 | 1.737086  | C                      | 0.570895  | 1.484303  | -2.618728 |
| C                      | -1.501344 | -0.499405 | 1.943114  | C                      | 1.277210  | 2.404844  | -3.380570 |
| C                      | -2.356876 | -0.763805 | 0.855551  | C                      | 2.551129  | 2.092182  | -3.892937 |
| C                      | -1.763952 | -0.884848 | -0.472174 | C                      | 3.115855  | 0.790903  | -3.559504 |
| O                      | -0.461267 | -0.772890 | -0.644887 | O                      | 2.460755  | -0.057009 | -2.783117 |
| C                      | 1.759989  | -0.828815 | 0.108579  | C                      | 0.368255  | -1.050763 | -2.905397 |
| C                      | 2.303077  | -0.727619 | -1.175065 | C                      | 0.635608  | -2.336629 | -2.426443 |
| C                      | 3.528333  | -1.310698 | -1.470056 | C                      | -0.001268 | -3.438420 | -2.983419 |
| C                      | 4.228873  | -2.002557 | -0.482235 | C                      | -0.910530 | -3.268694 | -4.026832 |
| C                      | 3.689364  | -2.113263 | 0.793962  | C                      | -1.176511 | -1.989775 | -4.506831 |
| C                      | 2.454576  | -1.534936 | 1.086447  | C                      | -0.541588 | -0.883404 | -3.947040 |
| C                      | -2.543585 | -1.146864 | -1.609945 | C                      | 4.373148  | 0.378083  | -4.019659 |
| C                      | -3.910091 | -1.324689 | -1.483429 | C                      | 5.137316  | 1.235045  | -4.802841 |
| C                      | -4.508560 | -1.211415 | -0.203637 | C                      | 4.616202  | 2.509302  | -5.130195 |
| C                      | -3.759023 | -0.935699 | 0.926150  | C                      | 3.365292  | 2.926338  | -4.693593 |
| H                      | 2.512870  | 1.554828  | 0.561198  | H                      | -0.927290 | -0.375009 | -0.587194 |
| H                      | 2.520310  | 3.998469  | 0.285631  | H                      | -0.893829 | -0.418441 | 1.883810  |
| H                      | 0.417507  | 5.211947  | -0.305743 | H                      | 1.237442  | -0.035807 | 3.117088  |
| H                      | -1.688670 | 3.916041  | -0.621474 | H                      | 3.334174  | 0.387839  | 1.841461  |
| H                      | -1.719539 | 1.489719  | -0.336245 | H                      | 3.302144  | 0.449680  | -0.626783 |
| H                      | 0.543499  | -0.145120 | 2.563152  | H                      | -0.384384 | 1.735521  | -2.160392 |
| H                      | -1.922623 | -0.437423 | 2.947571  | H                      | 0.858065  | 3.393873  | -3.571401 |
| H                      | 1.754552  | -0.180567 | -1.943591 | H                      | 1.348642  | -2.469147 | -1.611107 |
| H                      | 3.942680  | -1.224097 | -2.476676 | H                      | 0.212090  | -4.438471 | -2.600328 |
| H                      | 5.195050  | -2.456699 | -0.711426 | H                      | -1.414452 | -4.134588 | -4.461380 |
| H                      | 4.227929  | -2.658065 | 1.572104  | H                      | -1.889879 | -1.848480 | -5.321409 |
| H                      | 2.026103  | -1.645310 | 2.082545  | H                      | -0.752874 | 0.123643  | -4.310627 |
| H                      | -2.031922 | -1.211935 | -2.571090 | H                      | 4.717608  | -0.617030 | -3.734406 |
| H                      | -4.522151 | -1.542950 | -2.359122 | H                      | 6.122876  | 0.932114  | -5.157184 |
| H                      | -5.588078 | -1.346594 | -0.108268 | H                      | 5.215827  | 3.184257  | -5.744991 |
| H                      | -4.244336 | -0.852878 | 1.900379  | H                      | 2.992090  | 3.915467  | -4.965036 |

| CI-S <sub>1</sub> /S <sub>0</sub> -C |           |           |           | CI-S <sub>1</sub> /S <sub>0</sub> -T |           |           |           |
|--------------------------------------|-----------|-----------|-----------|--------------------------------------|-----------|-----------|-----------|
| C                                    | -1.936154 | -0.687134 | -0.802375 | C                                    | 1.410845  | -1.235039 | -0.857083 |
| C                                    | -2.349720 | -0.631696 | 0.610768  | C                                    | 1.869632  | -1.525554 | 0.491929  |
| C                                    | -1.440626 | -0.510581 | 1.710700  | C                                    | 0.837142  | -1.796481 | 1.508946  |
| C                                    | -0.110208 | -0.252274 | 1.825795  | C                                    | -0.360207 | -1.182727 | 1.584255  |
| C                                    | 0.944574  | 0.110339  | 0.876068  | C                                    | -0.853656 | -0.085992 | 0.741802  |
| O                                    | -0.755073 | -0.650897 | -1.151887 | O                                    | 0.217158  | -1.417191 | -1.169877 |
| C                                    | -3.014260 | -0.777961 | -1.787518 | C                                    | 2.385251  | -0.738489 | -1.797277 |
| C                                    | -4.322105 | -0.814060 | -1.427981 | C                                    | 3.729440  | -0.760986 | -1.492938 |
| C                                    | -4.695645 | -0.782953 | -0.048669 | C                                    | 4.152775  | -1.175694 | -0.219977 |
| C                                    | -3.729593 | -0.703279 | 0.923123  | C                                    | 3.222846  | -1.529297 | 0.768424  |
| C                                    | 1.113188  | 1.559219  | 0.612917  | C                                    | -2.222255 | -0.192396 | 0.263459  |
| C                                    | 1.955399  | -0.807058 | 0.495914  | C                                    | -0.044028 | 1.082966  | 0.511446  |
| C                                    | 2.927001  | -0.445573 | -0.473558 | C                                    | 0.997231  | 1.447305  | 1.392671  |
| C                                    | 3.943581  | -1.316501 | -0.816439 | C                                    | 1.785408  | 2.566031  | 1.151497  |
| C                                    | 4.037743  | -2.568014 | -0.199123 | C                                    | 1.581193  | 3.340073  | 0.012138  |
| C                                    | 3.078894  | -2.953902 | 0.740298  | C                                    | 0.580177  | 2.979267  | -0.893661 |
| C                                    | 2.041215  | -2.100083 | 1.072238  | C                                    | -0.217267 | 1.874369  | -0.652255 |
| C                                    | 2.138662  | 2.252412  | 1.273591  | C                                    | -2.764982 | -1.457636 | -0.038234 |
| C                                    | 2.304895  | 3.620181  | 1.086949  | C                                    | -4.088242 | -1.584666 | -0.439474 |
| C                                    | 1.460912  | 4.308007  | 0.219210  | C                                    | -4.905059 | -0.458814 | -0.539065 |
| C                                    | 0.447305  | 3.625544  | -0.448537 | C                                    | -4.385419 | 0.800526  | -0.242880 |
| C                                    | 0.262038  | 2.262273  | -0.245211 | C                                    | -3.060227 | 0.933959  | 0.149963  |
| H                                    | -1.944052 | -0.615704 | 2.677396  | H                                    | 1.071563  | -2.544078 | 2.274590  |
| H                                    | 0.243314  | -0.219302 | 2.867972  | H                                    | -1.056213 | -1.549441 | 2.346203  |
| H                                    | -2.692905 | -0.829744 | -2.828852 | H                                    | 2.014163  | -0.446772 | -2.781674 |
| H                                    | -5.104683 | -0.873485 | -2.188152 | H                                    | 4.474646  | -0.494658 | -2.246220 |
| H                                    | -5.753168 | -0.827903 | 0.221666  | H                                    | 5.220613  | -1.227957 | 0.003999  |
| H                                    | -4.025714 | -0.676738 | 1.975056  | H                                    | 3.576271  | -1.822932 | 1.761414  |
| H                                    | 2.844622  | 0.526752  | -0.959354 | H                                    | 1.160427  | 0.858273  | 2.292659  |
| H                                    | 4.674793  | -1.021417 | -1.572984 | H                                    | 2.565879  | 2.837746  | 1.865127  |
| H                                    | 4.855496  | -3.243114 | -0.455534 | H                                    | 2.201493  | 4.221374  | -0.174786 |
| H                                    | 3.148520  | -3.932900 | 1.218575  | H                                    | 0.436715  | 3.556293  | -1.808982 |
| H                                    | 1.297375  | -2.408045 | 1.808284  | H                                    | -0.954446 | 1.567830  | -1.392328 |
| H                                    | 2.803370  | 1.708360  | 1.948124  | H                                    | -2.112169 | -2.328417 | 0.003260  |
| H                                    | 3.098255  | 4.149779  | 1.619903  | H                                    | -4.485318 | -2.572771 | -0.680493 |
| H                                    | 1.594036  | 5.379390  | 0.063201  | H                                    | -5.950278 | -0.565958 | -0.842558 |
| H                                    | -0.205161 | 4.159101  | -1.142331 | H                                    | -5.023239 | 1.685295  | -0.302346 |
| H                                    | -0.509139 | 1.715759  | -0.784393 | H                                    | -2.671279 | 1.917049  | 0.412207  |

| S <sub>0</sub> -TC |           |           | S <sub>0</sub> -TT |   |           |           |           |
|--------------------|-----------|-----------|--------------------|---|-----------|-----------|-----------|
| C                  | -0.005772 | -0.039803 | 0.002030           | C | -0.004915 | -0.010387 | 0.005194  |
| C                  | -0.013711 | -0.037415 | 1.392175           | C | -0.011639 | -0.014356 | 1.395112  |
| C                  | 1.184459  | 0.014472  | 2.099218           | C | 1.188284  | -0.003936 | 2.102223  |
| C                  | 2.391512  | 0.065939  | 1.405030           | C | 2.395814  | 0.010191  | 1.408532  |
| C                  | 2.400424  | 0.069648  | 0.016177           | C | 2.403013  | 0.021506  | 0.018478  |
| C                  | 1.200985  | 0.021385  | -0.711035          | C | 1.203046  | 0.019304  | -0.706720 |
| C                  | 1.202721  | 0.049028  | -2.191146          | C | 1.203137  | 0.058529  | -2.188395 |
| C                  | 2.209045  | 0.670972  | -2.865020          | C | 2.151275  | 0.772445  | -2.852453 |
| C                  | 2.375383  | 0.629559  | -4.288868          | C | 2.338627  | 0.775727  | -4.276124 |
| C                  | 3.313680  | 1.287816  | -5.039233          | C | 3.185454  | 1.573846  | -4.988085 |
| C                  | 4.326416  | 2.217395  | -4.451142          | C | 3.234494  | 1.344744  | -6.468472 |
| O                  | 4.396613  | 2.469925  | -3.254803          | O | 2.552732  | 0.493435  | -7.016656 |
| C                  | 0.068723  | -0.610493 | -2.887985          | C | 0.132239  | -0.690681 | -2.889785 |
| C                  | -0.255418 | -1.944644 | -2.606427          | C | -0.141058 | -2.020597 | -2.539464 |
| C                  | -1.306838 | -2.572519 | -3.263205          | C | -1.131006 | -2.738071 | -3.199006 |
| C                  | -2.065668 | -1.872739 | -4.200196          | C | -1.878661 | -2.134212 | -4.208742 |
| C                  | -1.764702 | -0.542575 | -4.476303          | C | -1.630000 | -0.809369 | -4.553122 |
| C                  | -0.704510 | 0.083579  | -3.826221          | C | -0.632519 | -0.092652 | -3.898883 |
| C                  | 5.260634  | 2.830524  | -5.402626          | C | 4.153487  | 2.206477  | -7.224159 |
| C                  | 5.206324  | 2.573914  | -6.727257          | C | 4.897580  | 3.150687  | -6.611311 |
| C                  | 4.223269  | 1.672627  | -7.284709          | C | 4.830607  | 3.366233  | -5.180057 |
| C                  | 3.329552  | 1.067420  | -6.472554          | C | 4.013990  | 2.612701  | -4.411904 |
| H                  | -0.950205 | -0.074196 | -0.542820          | H | -0.948698 | -0.017013 | -0.542341 |
| H                  | -0.964624 | -0.074835 | 1.927583           | H | -0.962773 | -0.025771 | 1.931292  |
| H                  | 1.178722  | 0.010415  | 3.191344           | H | 1.182428  | -0.014718 | 3.194256  |
| H                  | 3.336561  | 0.096830  | 1.950956           | H | 3.341371  | 0.001419  | 1.954566  |
| H                  | 3.352072  | 0.091062  | -0.516481          | H | 3.353695  | 0.003216  | -0.517283 |
| H                  | 2.962500  | 1.230286  | -2.314385          | H | 2.836801  | 1.371631  | -2.250368 |
| H                  | 1.693828  | -0.023588 | -4.842126          | H | 1.772779  | 0.058943  | -4.876863 |
| H                  | 0.332568  | -2.492498 | -1.867531          | H | 0.440023  | -2.494998 | -1.746482 |
| H                  | -1.539106 | -3.615871 | -3.040267          | H | -1.322120 | -3.777076 | -2.923233 |
| H                  | -2.896890 | -2.364430 | -4.709571          | H | -2.659449 | -2.697339 | -4.723944 |
| H                  | -2.362288 | 0.016433  | -5.199352          | H | -2.216629 | -0.326236 | -5.336828 |
| H                  | -0.478922 | 1.131477  | -4.032144          | H | -0.452177 | 0.950853  | -4.160993 |
| H                  | 5.997862  | 3.508139  | -4.968476          | H | 4.195210  | 2.036453  | -8.301461 |
| H                  | 5.919178  | 3.054331  | -7.402744          | H | 5.572261  | 3.777931  | -7.200049 |
| H                  | 4.214079  | 1.488588  | -8.360316          | H | 5.447131  | 4.147892  | -4.732781 |
| H                  | 2.582457  | 0.383955  | -6.884709          | H | 3.966401  | 2.790545  | -3.336051 |



**Table S6** Cartesian coordinates (in Å) for geometries optimized in Table S1 at CAM-B3LYP-D3/def2-SV(P) level of theory.

| S <sub>0</sub> -C |           |           |           | S <sub>0</sub> -T |           |           |           |
|-------------------|-----------|-----------|-----------|-------------------|-----------|-----------|-----------|
| C                 | 1.538194  | 1.984116  | 0.958386  | C                 | 0.009444  | 2.181736  | 1.110396  |
| C                 | 1.781901  | 3.345220  | 0.819896  | C                 | 0.050901  | 3.553111  | 0.852113  |
| C                 | 1.113999  | 4.079924  | -0.160154 | C                 | -0.235616 | 4.033252  | -0.420493 |
| C                 | 0.208567  | 3.438213  | -0.997908 | C                 | -0.566969 | 3.136783  | -1.438125 |
| C                 | -0.033358 | 2.070867  | -0.859954 | C                 | -0.614907 | 1.773913  | -1.176468 |
| C                 | 0.625939  | 1.333013  | 0.120959  | C                 | -0.328444 | 1.283610  | 0.102031  |
| C                 | 0.360355  | -0.163094 | 0.304558  | C                 | -0.389587 | -0.232293 | 0.319750  |
| C                 | -0.163433 | -0.377640 | 1.710967  | C                 | 0.062821  | -0.645443 | 1.706122  |
| C                 | -1.465292 | -0.526865 | 1.961101  | C                 | 1.339695  | -0.963480 | 1.934306  |
| C                 | -2.429205 | -0.557707 | 0.867716  | C                 | 2.302180  | -0.947151 | 0.837541  |
| C                 | -1.918116 | -0.599701 | -0.436881 | C                 | 1.783587  | -0.876567 | -0.464417 |
| O                 | -0.585741 | -0.607034 | -0.678179 | O                 | 0.443908  | -0.847818 | -0.671681 |
| C                 | 1.608225  | -1.004601 | 0.034971  | C                 | -1.801882 | -0.760223 | 0.077600  |
| C                 | 2.593950  | -0.572115 | -0.853469 | C                 | -2.900633 | -0.080144 | 0.608192  |
| C                 | 3.687651  | -1.382934 | -1.146698 | C                 | -4.188164 | -0.583166 | 0.447608  |
| C                 | 3.808567  | -2.637600 | -0.554428 | C                 | -4.392920 | -1.770957 | -0.251909 |
| C                 | 2.824857  | -3.079973 | 0.327195  | C                 | -3.300920 | -2.450538 | -0.784321 |
| C                 | 1.731330  | -2.268173 | 0.615509  | C                 | -2.010728 | -1.950719 | -0.617299 |
| C                 | -2.774507 | -0.684172 | -1.531918 | C                 | 2.626557  | -0.907306 | -1.570539 |
| C                 | -4.151120 | -0.708399 | -1.328808 | C                 | 4.002761  | -0.995381 | -1.380893 |
| C                 | -4.677603 | -0.654231 | -0.037800 | C                 | 4.537741  | -1.057635 | -0.093643 |
| C                 | -3.813799 | -0.585285 | 1.050054  | C                 | 3.685863  | -1.038868 | 1.005665  |
| H                 | 2.078796  | 1.416710  | 1.720614  | H                 | 0.252306  | 1.811773  | 2.108101  |
| H                 | 2.501442  | 3.837365  | 1.479720  | H                 | 0.316840  | 4.246866  | 1.654127  |
| H                 | 1.305360  | 5.150590  | -0.271008 | H                 | -0.199054 | 5.106739  | -0.624789 |
| H                 | -0.317191 | 4.002681  | -1.772618 | H                 | -0.791602 | 3.506504  | -2.442064 |
| H                 | -0.735096 | 1.572201  | -1.528248 | H                 | -0.875805 | 1.068981  | -1.969168 |
| H                 | 0.572274  | -0.349685 | 2.517096  | H                 | -0.687587 | -0.656042 | 2.499729  |
| H                 | -1.832431 | -0.631378 | 2.985916  | H                 | 1.682836  | -1.249868 | 2.932598  |
| H                 | 2.507235  | 0.410003  | -1.321834 | H                 | -2.749400 | 0.860883  | 1.143042  |
| H                 | 4.452201  | -1.030026 | -1.844051 | H                 | -5.038655 | -0.038345 | 0.865631  |
| H                 | 4.669114  | -3.272593 | -0.781635 | H                 | -5.404273 | -2.164436 | -0.383610 |
| H                 | 2.906880  | -4.065733 | 0.792397  | H                 | -3.451530 | -3.382993 | -1.334855 |
| H                 | 0.954325  | -2.625117 | 1.296009  | H                 | -1.153074 | -2.480806 | -1.031519 |
| H                 | -2.339724 | -0.732278 | -2.532395 | H                 | 2.185066  | -0.858384 | -2.567691 |
| H                 | -4.820424 | -0.769217 | -2.191024 | H                 | 4.665574  | -1.012155 | -2.250037 |
| H                 | -5.758743 | -0.671753 | 0.118987  | H                 | 5.618640  | -1.125925 | 0.051038  |
| H                 | -4.211198 | -0.554977 | 2.068763  | H                 | 4.092444  | -1.100445 | 2.019298  |

| <b>S<sub>0</sub>-CC-C</b> |           |           |           | <b>S<sub>0</sub>-CC-T</b> |           |           |           |
|---------------------------|-----------|-----------|-----------|---------------------------|-----------|-----------|-----------|
| C                         | 0.344599  | 1.747077  | -0.981340 | C                         | -0.004459 | 0.012694  | 0.009072  |
| C                         | 0.961623  | 2.934352  | -0.600788 | C                         | -0.012570 | 0.011072  | 1.399896  |
| C                         | 0.834767  | 3.397942  | 0.707009  | C                         | 1.187701  | 0.007782  | 2.107774  |
| C                         | 0.075992  | 2.675482  | 1.626370  | C                         | 2.396369  | 0.004155  | 1.414439  |
| C                         | -0.543919 | 1.492670  | 1.243448  | C                         | 2.404002  | 0.011587  | 0.023564  |
| C                         | -0.404568 | 1.004749  | -0.062556 | C                         | 1.204260  | 0.024545  | -0.701272 |
| C                         | -1.034461 | -0.275156 | -0.451221 | C                         | 1.213509  | 0.052268  | -2.183322 |
| C                         | -0.379443 | -1.234551 | -1.152192 | C                         | 2.146453  | 0.789957  | -2.836197 |
| C                         | 1.013668  | -1.309166 | -1.536974 | C                         | 2.401188  | 0.908301  | -4.255992 |
| C                         | 2.177773  | -1.054803 | -0.864924 | C                         | 2.472716  | -0.012335 | -5.265294 |
| C                         | 2.249953  | -0.743029 | 0.595588  | C                         | 2.426886  | -1.491653 | -5.053761 |
| O                         | 1.266727  | -0.700397 | 1.319138  | O                         | 2.324234  | -2.006280 | -3.950679 |
| C                         | -2.462432 | -0.466026 | -0.102132 | C                         | 0.144615  | -0.690393 | -2.884990 |
| C                         | -3.359345 | 0.611098  | -0.135658 | C                         | -0.143036 | -2.015975 | -2.533593 |
| C                         | -4.703645 | 0.427661  | 0.170241  | C                         | -1.120217 | -2.731946 | -3.213929 |
| C                         | -5.174890 | -0.833682 | 0.529594  | C                         | -1.835302 | -2.131289 | -4.248818 |
| C                         | -4.291480 | -1.910097 | 0.581102  | C                         | -1.574062 | -0.806386 | -4.591687 |
| C                         | -2.948385 | -1.727471 | 0.268594  | C                         | -0.592368 | -0.092133 | -3.912281 |
| C                         | 3.594057  | -0.515870 | 1.141716  | C                         | 2.545701  | -2.320416 | -6.260230 |
| C                         | 4.704475  | -0.611501 | 0.380009  | C                         | 2.711355  | -1.783247 | -7.487635 |
| C                         | 4.627977  | -0.961036 | -1.021813 | C                         | 2.797816  | -0.351620 | -7.677022 |
| C                         | 3.426550  | -1.180146 | -1.598605 | C                         | 2.694716  | 0.477337  | -6.615886 |
| H                         | 0.436912  | 1.390059  | -2.009161 | H                         | -0.948413 | 0.016211  | -0.540379 |
| H                         | 1.539551  | 3.505098  | -1.332373 | H                         | -0.965191 | 0.012270  | 1.936131  |
| H                         | 1.320070  | 4.329985  | 1.008287  | H                         | 1.181091  | -0.000700 | 3.201166  |
| H                         | -0.028095 | 3.033956  | 2.653675  | H                         | 3.342475  | -0.016816 | 1.961683  |
| H                         | -1.119005 | 0.915341  | 1.969454  | H                         | 3.353043  | -0.023774 | -0.516279 |
| H                         | -0.993852 | -2.037059 | -1.576826 | H                         | 2.748315  | 1.472508  | -2.225093 |
| H                         | 1.154837  | -1.700937 | -2.554158 | H                         | 2.638678  | 1.936574  | -4.563960 |
| H                         | -2.995644 | 1.601664  | -0.416617 | H                         | 0.432654  | -2.493331 | -1.738774 |
| H                         | -5.389420 | 1.277998  | 0.128460  | H                         | -1.321204 | -3.770559 | -2.939354 |
| H                         | -6.229652 | -0.976060 | 0.779208  | H                         | -2.604722 | -2.694770 | -4.783399 |
| H                         | -4.648882 | -2.898873 | 0.880203  | H                         | -2.142999 | -0.323062 | -5.390192 |
| H                         | -2.253504 | -2.567119 | 0.341753  | H                         | -0.395500 | 0.949219  | -4.174976 |
| H                         | 3.631962  | -0.261226 | 2.203044  | H                         | 2.486773  | -3.398697 | -6.095661 |
| H                         | 5.688617  | -0.430077 | 0.822579  | H                         | 2.790835  | -2.434150 | -8.363679 |
| H                         | 5.549121  | -1.047768 | -1.602649 | H                         | 2.950403  | 0.047047  | -8.682551 |
| H                         | 3.364147  | -1.446880 | -2.657858 | H                         | 2.761077  | 1.560784  | -6.754785 |

| Si-C |           |           |           | Si-T |           |           |           |
|------|-----------|-----------|-----------|------|-----------|-----------|-----------|
| C    | 1.587295  | 2.070954  | 0.307984  | C    | 0.006594  | -0.188418 | -0.053410 |
| C    | 1.590328  | 3.450012  | 0.151500  | C    | 0.028107  | -0.217647 | 1.335707  |
| C    | 0.417801  | 4.131347  | -0.185102 | C    | 1.220470  | -0.004890 | 2.027613  |
| C    | -0.758508 | 3.406134  | -0.361214 | C    | 2.392190  | 0.235501  | 1.312023  |
| C    | -0.775053 | 2.024877  | -0.198868 | C    | 2.376113  | 0.273159  | -0.079114 |
| C    | 0.403858  | 1.333612  | 0.128826  | C    | 1.180447  | 0.069143  | -0.773434 |
| C    | 0.404977  | -0.186712 | 0.374349  | C    | 1.115132  | 0.146850  | -2.300750 |
| C    | -0.137852 | -0.340393 | 1.738035  | C    | 0.571209  | 1.484210  | -2.617921 |
| C    | -1.503332 | -0.494886 | 1.944222  | C    | 1.276830  | 2.404930  | -3.380204 |
| C    | -2.358403 | -0.764143 | 0.857178  | C    | 2.551086  | 2.091973  | -3.893003 |
| C    | -1.764877 | -0.886880 | -0.469971 | C    | 3.115423  | 0.790361  | -3.559667 |
| O    | -0.462500 | -0.771136 | -0.643266 | O    | 2.461033  | -0.057428 | -2.782694 |
| C    | 1.758864  | -0.827804 | 0.108908  | C    | 0.369395  | -1.051005 | -2.906381 |
| C    | 2.305321  | -0.719750 | -1.173136 | C    | 0.636073  | -2.337390 | -2.426195 |
| C    | 3.530187  | -1.304155 | -1.470028 | C    | -0.001704 | -3.439237 | -2.983035 |
| C    | 4.227398  | -2.004555 | -0.484977 | C    | -0.911314 | -3.268903 | -4.027024 |
| C    | 3.684690  | -2.122126 | 0.789942  | C    | -1.177345 | -1.989092 | -4.507760 |
| C    | 2.450238  | -1.542097 | 1.083650  | C    | -0.541208 | -0.882861 | -3.947823 |
| C    | -2.543707 | -1.153238 | -1.607603 | C    | 4.373020  | 0.377612  | -4.019760 |
| C    | -3.910558 | -1.334026 | -1.481472 | C    | 5.137767  | 1.234641  | -4.802799 |
| C    | -4.509850 | -1.219035 | -0.201553 | C    | 4.616768  | 2.509724  | -5.130312 |
| C    | -3.760471 | -0.938536 | 0.928008  | C    | 3.365418  | 2.926228  | -4.693246 |
| H    | 2.514065  | 1.556137  | 0.566340  | H    | -0.927884 | -0.375234 | -0.588032 |
| H    | 2.524646  | 4.001015  | 0.290599  | H    | -0.896077 | -0.418977 | 1.884379  |
| H    | 0.422808  | 5.217375  | -0.306769 | H    | 1.237328  | -0.035624 | 3.119849  |
| H    | -1.685133 | 3.921391  | -0.628990 | H    | 3.336041  | 0.389235  | 1.842082  |
| H    | -1.717510 | 1.493624  | -0.344852 | H    | 3.302815  | 0.450993  | -0.627470 |
| H    | 0.541289  | -0.135620 | 2.565202  | H    | -0.385440 | 1.735868  | -2.159790 |
| H    | -1.924846 | -0.430556 | 2.949636  | H    | 0.856933  | 3.394739  | -3.572062 |
| H    | 1.759646  | -0.165805 | -1.940146 | H    | 1.350257  | -2.470041 | -1.610418 |
| H    | 3.946924  | -1.211797 | -2.476437 | H    | 0.212633  | -4.440612 | -2.599616 |
| H    | 5.193889  | -2.460211 | -0.715456 | H    | -1.415678 | -4.135634 | -4.462051 |
| H    | 4.220604  | -2.674023 | 1.566578  | H    | -1.891158 | -1.847412 | -5.323653 |
| H    | 2.020062  | -1.658833 | 2.079270  | H    | -0.752465 | 0.125417  | -4.311634 |
| H    | -2.031383 | -1.219501 | -2.569343 | H    | 4.718204  | -0.618238 | -3.734099 |
| H    | -4.522514 | -1.556061 | -2.357733 | H    | 6.123723  | 0.931266  | -5.158642 |
| H    | -5.590199 | -1.356451 | -0.105701 | H    | 5.216090  | 3.185597  | -5.746185 |
| H    | -4.246468 | -0.854489 | 1.902993  | H    | 2.991817  | 3.916371  | -4.964763 |

| CI-S <sub>1</sub> /S <sub>0</sub> -C |           |           |           | CI-S <sub>1</sub> /S <sub>0</sub> -T |           |           |           |
|--------------------------------------|-----------|-----------|-----------|--------------------------------------|-----------|-----------|-----------|
| C                                    | -1.936154 | -0.687134 | -0.802375 | C                                    | 1.410845  | -1.235039 | -0.857083 |
| C                                    | -2.349720 | -0.631696 | 0.610768  | C                                    | 1.869632  | -1.525554 | 0.491929  |
| C                                    | -1.440626 | -0.510581 | 1.710700  | C                                    | 0.837142  | -1.796481 | 1.508946  |
| C                                    | -0.110208 | -0.252274 | 1.825795  | C                                    | -0.360207 | -1.182727 | 1.584255  |
| C                                    | 0.944574  | 0.110339  | 0.876068  | C                                    | -0.853656 | -0.085992 | 0.741802  |
| O                                    | -0.755073 | -0.650897 | -1.151887 | O                                    | 0.217158  | -1.417191 | -1.169877 |
| C                                    | -3.014260 | -0.777961 | -1.787518 | C                                    | 2.385251  | -0.738489 | -1.797277 |
| C                                    | -4.322105 | -0.814060 | -1.427981 | C                                    | 3.729440  | -0.760986 | -1.492938 |
| C                                    | -4.695645 | -0.782953 | -0.048669 | C                                    | 4.152775  | -1.175694 | -0.219977 |
| C                                    | -3.729593 | -0.703279 | 0.923123  | C                                    | 3.222846  | -1.529297 | 0.768424  |
| C                                    | 1.113188  | 1.559219  | 0.612917  | C                                    | -2.222255 | -0.192396 | 0.263459  |
| C                                    | 1.955399  | -0.807058 | 0.495914  | C                                    | -0.044028 | 1.082966  | 0.511446  |
| C                                    | 2.927001  | -0.445573 | -0.473558 | C                                    | 0.997231  | 1.447305  | 1.392671  |
| C                                    | 3.943581  | -1.316501 | -0.816439 | C                                    | 1.785408  | 2.566031  | 1.151497  |
| C                                    | 4.037743  | -2.568014 | -0.199123 | C                                    | 1.581193  | 3.340073  | 0.012138  |
| C                                    | 3.078894  | -2.953902 | 0.740298  | C                                    | 0.580177  | 2.979267  | -0.893661 |
| C                                    | 2.041215  | -2.100083 | 1.072238  | C                                    | -0.217267 | 1.874369  | -0.652255 |
| C                                    | 2.138662  | 2.252412  | 1.273591  | C                                    | -2.764982 | -1.457636 | -0.038234 |
| C                                    | 2.304895  | 3.620181  | 1.086949  | C                                    | -4.088242 | -1.584666 | -0.439474 |
| C                                    | 1.460912  | 4.308007  | 0.219210  | C                                    | -4.905059 | -0.458814 | -0.539065 |
| C                                    | 0.447305  | 3.625544  | -0.448537 | C                                    | -4.385419 | 0.800526  | -0.242880 |
| C                                    | 0.262038  | 2.262273  | -0.245211 | C                                    | -3.060227 | 0.933959  | 0.149963  |
| H                                    | -1.944052 | -0.615704 | 2.677396  | H                                    | 1.071563  | -2.544078 | 2.274590  |
| H                                    | 0.243314  | -0.219302 | 2.867972  | H                                    | -1.056213 | -1.549441 | 2.346203  |
| H                                    | -2.692905 | -0.829744 | -2.828852 | H                                    | 2.014163  | -0.446772 | -2.781674 |
| H                                    | -5.104683 | -0.873485 | -2.188152 | H                                    | 4.474646  | -0.494658 | -2.246220 |
| H                                    | -5.753168 | -0.827903 | 0.221666  | H                                    | 5.220613  | -1.227957 | 0.003999  |
| H                                    | -4.025714 | -0.676738 | 1.975056  | H                                    | 3.576271  | -1.822932 | 1.761414  |
| H                                    | 2.844622  | 0.526752  | -0.959354 | H                                    | 1.160427  | 0.858273  | 2.292659  |
| H                                    | 4.674793  | -1.021417 | -1.572984 | H                                    | 2.565879  | 2.837746  | 1.865127  |
| H                                    | 4.855496  | -3.243114 | -0.455534 | H                                    | 2.201493  | 4.221374  | -0.174786 |
| H                                    | 3.148520  | -3.932900 | 1.218575  | H                                    | 0.436715  | 3.556293  | -1.808982 |
| H                                    | 1.297375  | -2.408045 | 1.808284  | H                                    | -0.954446 | 1.567830  | -1.392328 |
| H                                    | 2.803370  | 1.708360  | 1.948124  | H                                    | -2.112169 | -2.328417 | 0.003260  |
| H                                    | 3.098255  | 4.149779  | 1.619903  | H                                    | -4.485318 | -2.572771 | -0.680493 |
| H                                    | 1.594036  | 5.379390  | 0.063201  | H                                    | -5.950278 | -0.565958 | -0.842558 |
| H                                    | -0.205161 | 4.159101  | -1.142331 | H                                    | -5.023239 | 1.685295  | -0.302346 |
| H                                    | -0.509139 | 1.715759  | -0.784393 | H                                    | -2.671279 | 1.917049  | 0.412207  |

| S <sub>0</sub> -TC |           |           | S <sub>0</sub> -TT |   |           |           |           |
|--------------------|-----------|-----------|--------------------|---|-----------|-----------|-----------|
| C                  | -0.005366 | -0.031201 | 0.003057           | C | -0.004976 | -0.009330 | 0.006781  |
| C                  | -0.014787 | -0.029674 | 1.393802           | C | -0.013145 | -0.013974 | 1.397339  |
| C                  | 1.183849  | 0.009692  | 2.102214           | C | 1.186819  | -0.007220 | 2.105705  |
| C                  | 2.392287  | 0.049356  | 1.408526           | C | 2.395345  | 0.003867  | 1.412402  |
| C                  | 2.401904  | 0.054229  | 0.018920           | C | 2.403182  | 0.016056  | 0.021683  |
| C                  | 1.202515  | 0.018589  | -0.709629          | C | 1.203605  | 0.017415  | -0.704783 |
| C                  | 1.204580  | 0.047564  | -2.189924          | C | 1.204303  | 0.057708  | -2.186519 |
| C                  | 2.211070  | 0.670765  | -2.863445          | C | 2.153153  | 0.772416  | -2.849844 |
| C                  | 2.379430  | 0.627992  | -4.288288          | C | 2.342191  | 0.775567  | -4.274412 |
| C                  | 3.314629  | 1.289760  | -5.040166          | C | 3.187017  | 1.575109  | -4.988139 |
| C                  | 4.320886  | 2.227933  | -4.454568          | C | 3.235777  | 1.342633  | -6.468124 |
| O                  | 4.387646  | 2.485938  | -3.259445          | O | 2.555399  | 0.488855  | -7.014070 |
| C                  | 0.070617  | -0.611094 | -2.887327          | C | 0.133622  | -0.690506 | -2.889176 |
| C                  | -0.261747 | -1.941887 | -2.598146          | C | -0.144440 | -2.019074 | -2.536388 |
| C                  | -1.313726 | -2.569789 | -3.255376          | C | -1.134664 | -2.736362 | -3.197093 |
| C                  | -2.065514 | -1.872452 | -4.200806          | C | -1.878311 | -2.132891 | -4.210929 |
| C                  | -1.756762 | -0.544949 | -4.484493          | C | -1.625209 | -0.808835 | -4.557824 |
| C                  | -0.695731 | 0.080305  | -3.833646          | C | -0.627194 | -0.093078 | -3.902032 |
| C                  | 5.253015  | 2.842964  | -5.407277          | C | 4.151623  | 2.205247  | -7.226803 |
| C                  | 5.202074  | 2.581107  | -6.731784          | C | 4.894335  | 3.153508  | -6.616800 |
| C                  | 4.224572  | 1.671519  | -7.287032          | C | 4.827929  | 3.372026  | -5.185494 |
| C                  | 3.333145  | 1.063870  | -6.472961          | C | 4.013411  | 2.617483  | -4.414752 |
| H                  | -0.950778 | -0.055788 | -0.542811          | H | -0.949521 | -0.012940 | -0.541581 |
| H                  | -0.967654 | -0.057961 | 1.928704           | H | -0.965886 | -0.023102 | 1.933102  |
| H                  | 1.177264  | 0.004887  | 3.195566           | H | 1.180184  | -0.018574 | 3.198964  |
| H                  | 3.338438  | 0.070126  | 1.955361           | H | 3.341717  | -0.007776 | 1.959316  |
| H                  | 3.355577  | 0.065238  | -0.512501          | H | 3.355493  | -0.004887 | -0.513244 |
| H                  | 2.963516  | 1.231614  | -2.311324          | H | 2.839071  | 1.372821  | -2.247135 |
| H                  | 1.701379  | -0.031821 | -4.840189          | H | 1.777736  | 0.055238  | -4.873748 |
| H                  | 0.320748  | -2.488431 | -1.852462          | H | 0.433712  | -2.493798 | -1.740048 |
| H                  | -1.551976 | -3.611589 | -3.025980          | H | -1.329082 | -3.775319 | -2.918877 |
| H                  | -2.897889 | -2.364057 | -4.710928          | H | -2.659907 | -2.695930 | -4.727528 |
| H                  | -2.349089 | 0.013001  | -5.214427          | H | -2.208851 | -0.325288 | -5.345124 |
| H                  | -0.464481 | 1.126781  | -4.045844          | H | -0.443855 | 0.950415  | -4.166446 |
| H                  | 5.986150  | 3.527210  | -4.974181          | H | 4.192520  | 2.032640  | -8.304702 |
| H                  | 5.913418  | 3.063472  | -7.409344          | H | 5.567506  | 3.782083  | -7.207982 |
| H                  | 4.217767  | 1.483216  | -8.363149          | H | 5.443388  | 4.157104  | -4.739855 |
| H                  | 2.589936  | 0.373680  | -6.883834          | H | 3.966240  | 2.797990  | -3.338201 |
